# Supplementary material
Source: Research Square preprint supplement (doi:10.21203/rs.3.rs-9000988/v1)
Supplement: Supplementary file 1 [file 1966231cfb404ac47c27ac9e.docx]

**Table 3: Level of EBP knowledge, beliefs, organizational readiness, and EBP implementation**

| **Items** | **Mean ± Std. Deviation** | **Rank** |
| --- | --- | --- |
| **Organizational Readiness for EBP** |  |  |
| a. direct care providers? | 3.5651 ± 1.07487 | 1 |
| To what extent do staff nurses have proficient computer skills? | 3.5255 ± 1.11177 | 2 |
| To what extent is EBP clearly described as central to the mission and philosophy of your institution? | 3.5074 ± 1.17355 | 3 |
| Staff Nurses? | 3.4417 ± 1.14966 | 4 |
| Nurse Educators? | 3.4304 ± 1.13712 | 5 |
| c. physician or other healthcare provider groups? | 3.4247 ± 1.08679 | 6 |
| To what extent do practitioners model EBP in their clinical settings? | 3.4145 ± 1.14598 | 7 |
| Advance Nurse Practitioners? | 3.3907 ± 1.17813 | 8 |
| To what extent is the physician team with whom you work committed to EBP? | 3.3692 ± 1.1884 | 9 |
| In your organization, to what extent is there a critical mass of nurses who have strong EBP knowledge and skills? | 3.3431 ± 1.16205 | 10 |
| To what extent do staff nurses have access to quality computers and access to electronic databases for searching for best evidence? | 3.333 ± 1.20849 | 11 |
| To what extent is the measurement and sharing of outcomes part of the culture of the organization in which you work? | 3.333 ± 1.15082 | 12 |
| To what extent are there administrators within your organization committed to EBP (i.e., have planned for resources and support [e.g., time] to initiate EBP)? | 3.3296 ± 1.15426 | 13 |
| To what extent is the nursing staff with whom you work committed to EBP? | 3.3216 ± 1.156 | 14 |
| b. upper administration? | 3.3171 ± 1.18533 | 15 |
| Physicians? | 3.299 ± 1.16305 | 16 |
| Administrators? | 3.2786 ± 1.15738 | 17 |
| To what extent are librarians used to search for evidence? | 3.2763 ± 1.17058 | 18 |
| To what extent are fiscal resources used to support EBP (e.g. education-attending EBP conferences/workshops, computers, paid time for the EBP process, mentors) | 3.2639 ± 1.1912 | 19 |
| To what extent do librarians within your organization have EBP knowledge and skills? | 3.2537 ± 1.19957 | 20 |
| Compared to 6 months ago, how much movement in your organization has there been toward an EBP culture. (place a hatch mark on the line to the right that indicates your response) | 3.2492 ± 1.15037 | 21 |
| In your organization, to what extent are there Advanced Practiced Nurses who are EBP mentors for staff nurses as well as other APNs? | 3.2299 ± 1.21607 | 22 |
| To what extent do you believe that EBP is practiced in your organization? | 3.1891 ± 1.30298 | 23 |
| To what extent are there nurse scientists (doctorally prepared researchers) in your organization to assist in generation of evidence when it does not exist? | 3.1676 ± 1.14741 | 24 |
| Overall, how would you rate your institution in readiness for EBP | 3.1642 ± 1.14938 | 25 |
| **EBP Beliefs** |  |  |
| I believe that EBP results in the best clinical care for patients. | 3.9354 ± 0.95198 | 1 |
| I am sure that I can implement EBP. | 3.6183 ± 0.96208 | 2 |
| I am sure that implementing EBP will improve the care that I deliver to my patients. | 3.5946 ± 1.08424 | 3 |
| I am sure about how to measure the outcomes of clinical care. | 3.5595 ± 1.02775 | 4 |
| I am sure that evidence-based guidelines can improve clinical care | 3.5345 ± 1.13674 | 5 |
| I believe that I can overcome barriers in implementing EBP. | 3.5176 ± 1.03809 | 6 |
| I am confident about my ability to implement EBP where I work. | 3.5108 ± 0.99923 | 7 |
| I believe that I can search for the best evidence to answer clinical questions in a time efficient way. | 3.496 ± 1.08103 | 8 |
| I am sure that I can access the best resources in order to implement EBP. | 3.4485 ± 1.04024 | 9 |
| I am sure that I can implement EBP in a time efficient way. | 3.4473 ± 1.07871 | 10 |
| I believe that critically appraising evidence is an important step in the EBP process. | 3.4462 ± 1.13399 | 11 |
| I believe the care that I deliver is evidence-based. | 3.4405 ± 1.04417 | 12 |
| I know how to implement EBP sufficiently enough to make practice changes. | 3.4202 ± 1.00741 | 13 |
| I believe that EBP takes too much time. | 3.3511 ± 1.00179 | 14 |
| I am clear about the steps of EBP. | 3.2616 ± 1.08304 | 15 |
| I believe EBP is difficult. | 3.171 ± 1.02197 | 16 |
| **EBP Implementation** |  |  |
| Used evidence to change my practice. | 1.9762 ± 1.13814 | 1 |
| Accessed an evidence-based guideline. | 1.7361 ± 1.17491 | 2 |
| Evaluated the outcomes of practice change... | 1.7101 ± 1.15753 | 3 |
| Shared an evidence-based guideline with a colleague. | 1.6897 ± 1.18522 | 4 |
| Used an evidence-based guideline or systematic review to change clinical practice where I work. | 1.6806 ± 1.17221 | 5 |
| Collected data on a clinical issue. | 1.6716 ± 1.22185 | 6 |
| Evaluated a care initiative by collecting patient outcome data. | 1.6636 ± 1.19195 | 7 |
| Shared evidence from a research study with a multi-disciplinary team member. | 1.6523 ± 1.16946 | 8 |
| Informally discussed evidence from a research study with a colleague. | 1.6444 ± 1.183 | 9 |
| Shared the outcome data collected with colleagues. | 1.6421 ± 1.2284 | 10 |
| Promoted the use of EBP to my colleagues. | 1.6387 ± 1.17599 | 11 |
| Read and critically appraised a clinical research study. | 1.6353 ± 1.16573 | 12 |
| Critically appraised evidence from a research study. | 1.6206 ± 1.16929 | 13 |
| Changed Practice based on patients outcome data | 1.6195 ± 1.20192 | 14 |
| Shared evidence from a research study with a patient/family member. | 1.5866 ± 1.16745 | 15 |
| Accessed the Cochrane database of systematic reviews. | 1.5776 ± 1.19211 | 16 |
| Generated a PICO question about my practice. | 1.5696 ± 1.18306 | 17 |
| Shared evidence from a study or studies in the form of a report or presentation to more than 2 colleagues. | 1.5583 ± 1.17309 | 18 |
| **EBP Knowledge** |  |  |
| Research skills | 4.0781 ± 1.34923 | 1 |
| Ability to review your own practice | 3.8199 ± 1.30773 | 2 |
| Dissemination of new ideas about care to colleagues | 3.7678 ± 1.29949 | 3 |
| Sharing of ideas and information with colleagues | 3.7531 ± 1.33596 | 4 |
| Monitoring and reviewing of practice skills | 3.6772 ± 1.24039 | 5 |
| Knowledge of how to retrieve evidence | 3.6172 ± 1.27002 | 6 |
| Ability to apply information to individual cases | 3.5957 ± 1.30439 | 7 |
| Ability to analyse critically evidence against set standards | 3.5934 ± 1.30889 | 8 |
| Ability to determine how valid (close to the truth) the material is | 3.5912 ± 1.31251 | 9 |
| Ability to determine how useful (clinically applicable) the material is | 3.5878 ± 1.31706 | 10 |
| Ability to identify gaps in your professional practice | 3.5878 ± 1.29798 | 11 |
| Awareness of major information types and sources | 3.4994 ± 1.28604 | 12 |
| Converting your information needs into a research question | 3.4858 ± 1.26463 | 13 |
| IT skills | 3.4813 ± 1.29294 | 14 |
